# Supplementary material
Source: PubMed Central journal article supplement (PMC4851862)
Supplement: NIHMS754422-supplement-01.pdf [file NIHMS754422-supplement-01.pdf]

## SUPPLEMENTAL FIGURE 1

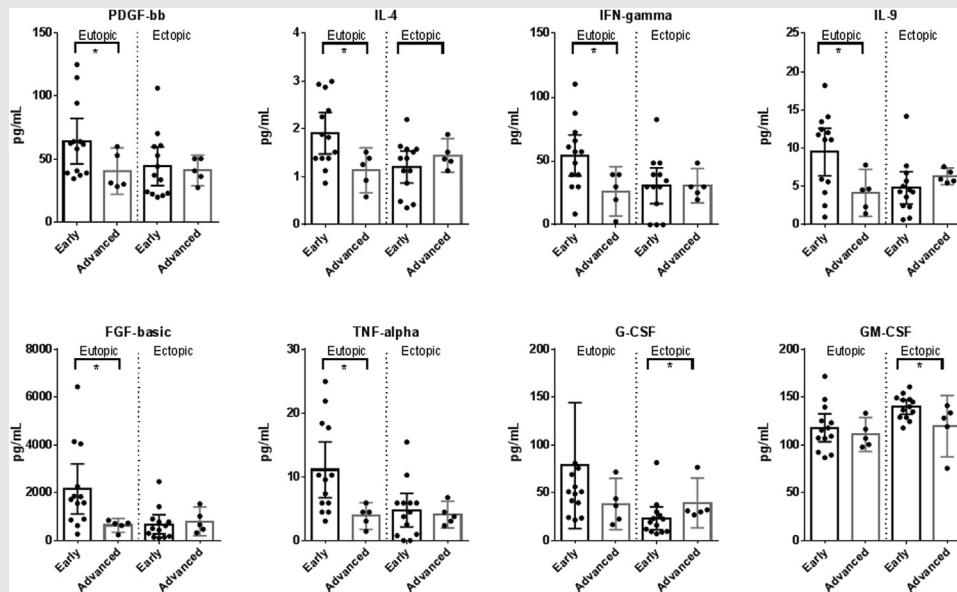

When tissue samples were stratified by disease stage and tissue type, levels of platelet-derived growth factor (PDGF) bb, interleukin (IL) 4, interferon (IFN)  $\gamma$ , IL-9, basic fibroblast growth factor (FGF-basic), and tumor necrosis factor (TNF)  $\alpha$  were found to be higher in early- vs. advanced-stage eutopic samples. In early- vs. advanced-stage ectopic samples, granulocyte-macrophage colony-stimulating factor (GM-CSF) levels were higher in early-stage compared to advanced-stage, whereas granulocyte colony-stimulating factor (G-CSF) levels were lower in early-stage compared with advanced-stage ectopic samples. No differences were observed for other cytokines. Bars represent the mean, and the whiskers represent the 95% confidence intervals. \* $P < .05$ ;  $n = 13$  (early stage);  $n = 5$  (advanced stage); paired  $t$  test or Wilcoxon signed ranked test.

Monsanto. Cytokines in the endometriosis. *Fertil Steril* 2015.

## SUPPLEMENTAL FIGURE 2

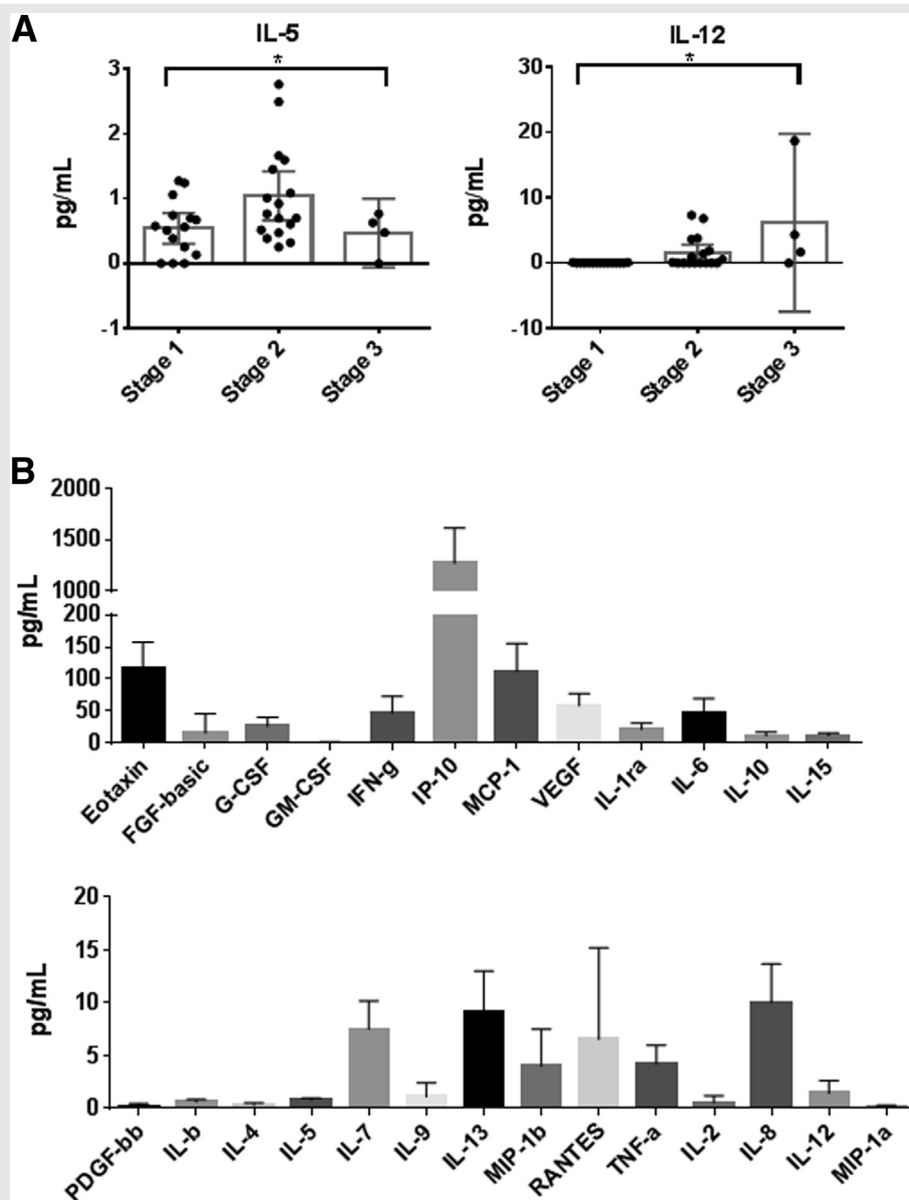

(A) Peritoneal fluid levels of IL-5 changed significantly according to endometriosis stage ( $P=.042$ ), but post hoc tests revealed that the differences were not significant. Differences in peritoneal fluid levels of IL-12 were significant only when comparing stage 3 vs. stage 1.  $*P<.05$ ;  $n = 36$ ; one-way analysis of variance (ANOVA) and Tukey test (IL-5); Kruskal-Wallis ANOVA and Dunn multiple comparison (IL-12). (B) Mean cytokine concentrations in the peritoneal fluid of patients. IP = interferon-inducible protein; MCP = monocyte chemotactic protein; MIP = macrophage inflammatory protein; RANTES = Regulated on activation, normal T expressed and secreted; VEGF = vascular endothelial growth factor; other abbreviations as in Supplemental Figure 1. Bars represent the mean, and the whiskers represent the 95% confidence intervals.

Monsanto. Cytokines in the endometriosis. *Fertil Steril* 2015.

## SUPPLEMENTAL TABLE 1

Comparison of cytokine profiles in plasma samples from endometriosis patients stratified by disease stage versus normal subjects.

| Cytokine      | Early endometriosis (n = 14) |          |          | Advanced endometriosis (n = 5) |          |         | Normal (n = 25) | df | H test   |         | Significance <sup>a</sup>                          |
|---------------|------------------------------|----------|----------|--------------------------------|----------|---------|-----------------|----|----------|---------|----------------------------------------------------|
|               | Pre-op                       | Post-op  | 3-mo     | Pre-op                         | Post-op  | 3-mo    |                 |    | $\chi^2$ | P value |                                                    |
| G-CSF         | 372.91                       | 347.51   | 339.38   | 460.72                         | 335.51   | 230.43  | 31.52           | 6  | 33.141   | <.001   | Advanced Pre-op > Normal;<br>All Early > Normal    |
| IFN- $\gamma$ | 550.39                       | 568.09   | 536.63   | 765.54                         | 468.05   | 606.03  | 12.64           | 6  | 24.656   | <.001   | Advanced Pre-op > Normal                           |
| RANTES        | 10344.38                     | 11676.73 | 12513.64 | 14090.46                       | 16945.80 | 9767.90 | 505.96          | 6  | 20.792   | .002    | Advanced Post-op > Normal                          |
| IL-1Ra        | 824.31                       | 647.15   | 650.44   | 862.77                         | 565.78   | 659.16  | 51.38           | 6  | 26.745   | <.001   | Advanced Pre-op > Normal;<br>Early Pre-op > Normal |
| IL-4          | 15.35                        | 15.66    | 15.45    | 22.36                          | 15.99    | 16.39   | 3.90            | 6  | 18.104   | .006    | Advanced Pre-op > Normal                           |
| IL-5          | 32.73                        | 25.57    | 27.22    | 33.86                          | 19.86    | 23.84   | 0.37            | 6  | 29.221   | <.001   | Advanced Pre-op > Normal                           |
| IL-6          | 44.99                        | 36.57    | 37.87    | 50.85                          | 34.07    | 39.54   | 2.05            | 6  | 22.347   | .001    | Advanced Pre-op > Normal;<br>Early Pre-op > Normal |
| IL-7          | 45.48                        | 49.61    | 47.42    | 57.59                          | 38.69    | 35.82   | 0.00            | 6  | 25.607   | <.001   | Advanced Pre-op > Normal;<br>All Early > Normal    |
| IL-9          | 37.59                        | 45.44    | 44.33    | 59.10                          | 60.67    | 40.73   | 0.68            | 6  | 25.15    | <.001   | Advanced Pre-op > Normal                           |
| IL-10         | 103.31                       | 80.88    | 67.99    | 137.26                         | 90.10    | 66.18   | 3.99            | 6  | 28.905   | <.001   | Advanced Pre-op > Normal                           |
| IL-12         | 71.98                        | 128.01   | 92.24    | 171.24                         | 125.29   | 88.62   | 6.40            | 6  | 22.684   | <.001   | Advanced Pre-op > Normal                           |

Note: Protein levels are expressed in units of pg/mL. bFGF = basic fibroblast growth factor; G-CSF = granulocyte colony-stimulating factor; IFN = interferon; IL = interleukin; IL-1Ra = interleukin -1 receptor antagonist; RANTES = Regulated on activation, normal T expressed and secreted.

<sup>a</sup> Kruskal-Wallis one-way analysis of variance (H test) and Dunn post hoc test.

Monsanto. Cytokines in the endometriosis. *Fertil Steril* 2015.

## SUPPLEMENTAL TABLE 2

Comparison of cytokine profiles in plasma samples from endometriosis patients stratified by disease stage versus normal subjects at proliferative and secretory phases of menstrual cycle.

| Cytokine      | Endometriosis (n = 19) |           |           | Normal (n = 9)  |                     | df | H test   |         | Significance <sup>a</sup>                                                                    |
|---------------|------------------------|-----------|-----------|-----------------|---------------------|----|----------|---------|----------------------------------------------------------------------------------------------|
|               | Pre-op                 | Post-op   | 3-mo      | Secretory phase | Proliferative phase |    | $\chi^2$ | P value |                                                                                              |
| Eotaxin       | 187.232                | 154.124   | 119.302   | 68.83           | 50.51               | 5  | 15.209   | .01     | Post-op > Proliferative                                                                      |
| G-CSF         | 376.745                | 339.129   | 319.49    | 0               | 16.92               | 5  | 42.909   | < .001  | All > Proliferative and Secretory                                                            |
| IFN- $\gamma$ | 726.181                | 495.652   | 606.033   | 10.59           | 9.13                | 5  | 43.528   | < .001  | All > Proliferative and Secretory                                                            |
| IP-10         | 508.331                | 587.684   | 533.152   | 224.85          | 284.02              | 5  | 29.479   | < .001  | All > Proliferative and Secretory, except 3-mo vs. Proliferative (which was not significant) |
| MCP-1         | 167.822                | 108.273   | 120.473   | 210.15          | 175.69              | 5  | 17.954   | .003    | Normal > Proliferative                                                                       |
| RANTES        | 12937.496              | 13219.218 | 11977.691 | 378.84          | 474.72              | 5  | 44.126   | < .001  | All > Proliferative and Secretory                                                            |
| TNF- $\alpha$ | 244.137                | 193.475   | 209.727   | 9.7             | 7.41                | 5  | 43.703   | < .001  | All > Proliferative and Secretory                                                            |
| IL-1b         | 12.239                 | 9.794     | 11.748    | 1.9             | 4.26                | 5  | 18.401   | .002    | Pre-op and 3-mo > Proliferative                                                              |
| IL-2          | 53.659                 | 38.976    | 40.06     | 4.01            | 4.27                | 5  | 14.703   | .012    | Pre-op > Proliferative                                                                       |
| IL-4          | 17.205                 | 15.988    | 16.176    | 1.31            | 3.59                | 5  | 36.516   | < .001  | All > Proliferative and Secretory                                                            |
| IL-5          | 33.856                 | 25.44     | 23.843    | 0.23            | 0.31                | 5  | 43.665   | < .001  | All > Proliferative and Secretory                                                            |
| IL-6          | 50.849                 | 34.074    | 39.542    | 1.92            | 1.15                | 5  | 38.542   | < .001  | All > Proliferative and Secretory                                                            |
| IL-7          | 47.455                 | 46.2      | 44.095    | 0               | 0                   | 5  | 42.12    | < .001  | All > Proliferative and Secretory                                                            |
| IL-8          | 175.699                | 157.218   | 146.653   | 16.55           | 7.72                | 5  | 35.06    | < .001  | All > Proliferative and Secretory                                                            |
| IL-9          | 46.191                 | 55.361    | 42.63     | 0.59            | 0.55                | 5  | 35.894   | < .001  | All > Proliferative and Secretory                                                            |
| IL-10         | 124.865                | 90.096    | 66.182    | 2.3             | 2.97                | 5  | 42.483   | < .001  | All > Proliferative and Secretory                                                            |
| IL-12         | 98.578                 | 125.291   | 88.624    | 2.57            | 4.19                | 5  | 34.494   | < .001  | All > Proliferative and Secretory                                                            |
| IL-13         | 19.755                 | 19.285    | 17.287    | 1.51            | 0.29                | 5  | 19.389   | .002    | Pre-op and 3-mo > Proliferative                                                              |

Note: Protein levels are expressed in units of pg/mL. MCP = monocyte chemotactic protein; RANTES = Regulated on activation, normal T expressed and secreted; TNF = tumor necrosis factor; other abbreviations as in Supplemental Table 1.

<sup>a</sup> Kruskal-Wallis one-way analysis of variance (H test) and Dunn post hoc test.

Monsanto. Cytokines in the endometriosis. Fertil Steril 2015.

## SUPPLEMENTAL TABLE 3

Pearson correlation coefficients and *P* values for the findings in this study.

| Variable             | Cytokine | Ectopic tissue   |                |
|----------------------|----------|------------------|----------------|
|                      |          | Pearson <i>r</i> | <i>P</i> value |
| Preoperative plasma  | VEGF     | 0.536            | .0219          |
| Postoperative plasma | IL-5     | 0.52             | .0269          |
| 3-mo plasma          | GM-CSF   | −0.529           | .024           |
|                      | IP-10    | 0.478            | .0451          |
|                      | G-CSF    | 0.499            | .0352          |
| Eutopic tissue       | IL-4     | −0.658           | .00301         |

*Monsanto. Cytokines in the endometriosis. Fertil Steril 2015.*
